# Supplementary material
Source: publisher figshare collection journal article supplement (https://tandf.figshare.com/articles/dataset/_/5702191)
Supplement: Supplementary file 1 [file 2]

## Supplemental file 1: Igbo Roland Morris Disability Questionnaire

Mgbe o bula ukwu na egbu gi mgbu, I nwere ike ihu na ufodu ihe i na eme mgbe mbu nweziri ike ihia gi ahu ime. Ihe ndia edeputara bu etu ndi mmadu siri kowaa onwe ha mgbe ha na enwe ukwu mgbu. Mgbe i guo ha ma o bu mmadu aguoro gi ha, I nwere ike ifu na ufodu kowara ka o di gi **ubochi taa**. I na agu ihe ndia, ma o bu mmadu ana aguru gi ha, chee maka onwe gi **ubochi taa**. Mgbe o bula i guru, ma o bu mmadu guru gi nke kowara gi ubochi taa, kanye ihe na ya ma o bu gwa onye guputara gi ya ka o kanye ihe na ya. O buru na okwu o bula akowaghi gi, hapu okwu ahu ma jee na nke ozo. Chetakwa ka i kanye ihe soso mgbe i kwetara na o kowara gi ubochi taa.

1. Ana m ano n'ulo, o foro ntakiri ka o buru mgbe nile n'ihu ukwu m.
2. Ana m anoghari otutu oge iji nweta onodu ga adiri ukwu m mma.
3. Eji m nwayo aga ije karia etu okwesiri maka ihi ukwu m
4. Maka ihi ukwu m, anaghi m aru oru o bula m na arubu n'ulo ma o bu akuku ulo.
5. Maka ihi ukwu m, ana m ejide ihe aka step ma m na arigo ulo elu.
6. Maka ihi ukwu m, ana m edina ala izu ike mgbe mgbe karia na mbu.
7. Maka ihi ukwu m, ana m ejide ihe aka wee bilie na oche nwere aka.
8. Maka ihi ukwu m, ana m ejisi ike achota ndi ozo ka ha mere m ihe.
9. Ana m eji nwayo nwayo eyiri akwa karia ka m kwesiri maka ihi ukwu m.
10. Ana m akwu oto obere oge maka ihi ukwu m.
11. Maka ihi ukwu m, ana m ejisi ike ghara ihu ehu ma o bu sekpuru ala.
12. O na ahia m ahu isi na oche ebili maka ihi ukwu m.
13. Ukwu m na-egbu m mgbu, oforo ntakari ka o buru mgbe niile.
14. Ona ahia m ahu itughari ma m dina ala maka ihi ukwu m.
15. Agu anaghi agu m nke oma maka ihi ukwu mgbu m
16. Ana m enwe nsogbu iyinye akpukpu ukwu m maka ihi mgbu di na ukwu m.
17. Ana m aga soso ije eteghi aka maka ihi ukwu mgbu m
18. Anaghi m arahu ura nke oma maka ihi ukwu m.
19. Maka ihi ukwu mgbu m, onye ozo na enyere m aka i yiri akwa
20. Ana m anodu ala otutu oge na ubochi maka ukwu m
21. Ana m ezere oru ike di n'ulo maka ihi ukwu m
22. Maka ihi ukwu mgbu m, ana m enwe mgbakasi ahu na iwe oku ebe ndi mmadu no karia mgbe mbu.
23. Maka ihi ukwu m, ana m eji nwayo nwayo arigo ulo elu ma o bu igbago ugwu karia na mbu.
24. Ana m edina ala otutu oge maka ihi ukwu m
